# Supplementary material
Source: Springer Nature journal article supplement (https://www.springermedizin.de/resource/supplementary/12885_2013_4003_MOESM1_ESM.pdf/9465014)
Supplement: MOESM1 [file 9465014]

(9) districts in Perak state

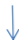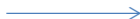

(4) districts were excluded

(5) districts were chosen after receiving approval from the state and district health offices

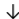

(4) villages were chosen per district  
Total villages = 20

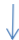

Households from each village were selected  
Total household (1250)

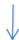

Total households' members (4358)

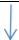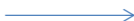

Not consented (864)

Consented (3494)

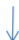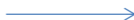

< 18 year (1115)

Total number of participants (2379)
